# Supplementary material for: Differential Detection of Human Papillomavirus Genotypes and Cervical Intraepithelial Neoplasia by Four Commercial Assays
Source: PubMed Central journal article supplement (PMC5078541; doi:10.1128/jcm.01321-16), 2016-10-24
Supplement: JCM.01321-16_zjm999095185so1.pdf [file JCM.01321-16_zjm999095185so1.pdf]

1 University of Copenhagen

2 Department of Public Health

6 August 2016

3

4

5 **Differential detection of Human Papillomavirus genotypes**  
6 **and cervical intraepithelial neoplasia by four commercial**  
7 **assays**

8

**SUPPLEMENTAL MATERIAL**

9

10 Matejka Rebolj,<sup>1#</sup> Jesper Bonde,<sup>2,3</sup> Sarah Preisler,<sup>2,3</sup>

11 Ditte Ejegod,<sup>3</sup> Carsten Rygaard,<sup>3</sup> Elsebeth Lynge<sup>1</sup>

12

13 <sup>1</sup> Department of Public Health, University of Copenhagen, Copenhagen, Denmark

14 <sup>2</sup> Clinical Research Centre, Copenhagen University Hospital Hvidovre, Hvidovre, Denmark

15 <sup>3</sup> Department of Pathology, Copenhagen University Hospital Hvidovre, Hvidovre, Denmark

16

17 #Correspondence to: m.rebolj@qmul.ac.uk

18

19 **HPV testing protocols in the Horizon study**

20

21 *Testing at the study baseline<sup>1</sup>*

22

23 HC2

24

25 We used post-quot material that remained from the cytology procedure. As part of the cytology  
26 processing, post-quot material was diluted approximately 1:1 in SurePath. DNA was either  
27 denatured prior to testing by pre-treating manually in line with the manufacturer's CE-IVD  
28 protocol, or was isolated and purified using the DSP AXpH DNA kit on QIASymphony SP (QIAGEN,  
29 Hilden, Germany). Testing was undertaken on automated Rapid Capture System (RCS; QIAGEN,  
30 Gaithersburg, MD, USA). A minority of samples used for routine HC2 triage of women with ASCUS  
31 at age  $\geq 30$  years were denatured and tested manually.

32

33 Cobas

34

35 1 ml of the diluted material was aliquoted into a 13 ml round bottom test tube (Sarstedt, cat. no  
36 NC9018280) and stored at 2-8°C until testing. No pre-treatment of SurePath samples was  
37 required. Extraction of DNA was undertaken on cobas x480, and amplification and detection of  
38 high-risk HPV DNA on cobas z480 analyzer. Fluorescent TaqMan probes were used for detection  
39 of the amplicons during polymerase chain reaction (PCR) cycles. Amplification and detection of  
40 the 330-bp  $\beta$ -globin was used as an internal control of the testing processes.

---

<sup>1</sup> These testing protocols were published, with minor textual revisions, in Rebolj et al. PLOS ONE 2014;9:e86835.

41

42 CLART

43

44 1 ml of the diluted SurePath sample was spun down for five minutes at 14,000 revolutions per  
45 minute, with supernatant removed and cell pellet re-suspended in a mix of 180 µl phosphate  
46 buffered saline (10x conc. pH 7.4, Pharmacy product) and 20 µl Proteinase K (recombinant, PCR  
47 Grade, Roche Diagnostics, Rotkreuz, Switzerland). Samples were then vortexed and incubated for  
48 one hour at 56°C and one hour at 90°C. HPV DNA was purified using MagNa Pure LC 96 and  
49 MagNA Pure LC 32 instruments (Roche Diagnostics) with MagNA Pure LC Total Nucleic Acid  
50 Isolation Kit (Roche Diagnostics). PCR amplification was performed using the CLART HPV2  
51 Amplification kit (Genomica). 5 µl of purified DNA were used for the PCR amplification. Prior to  
52 visualisation, the PCR products were denatured at 95°C for 10 minutes. Visualisation was  
53 performed using 10 µl of the denatured PCR products on the CLART microarray. Hybridisation  
54 between the amplicons and their specific probes on the microarray resulted in formation of an  
55 insoluble precipitate of peroxidase when adding a Streptavidin conjugate that binds to the biotin-  
56 labeled PCR products. The precipitate was analyzed automatically on the Clinical Array Reader  
57 (Genomica).

58

59 APTIMA

60

61 1 ml of the diluted sample was aliquoted into an APTIMA Specimen Transfer Tube containing 2.9  
62 ml of buffered solution (Hologic/Gen-Probe). Samples were treated with proteinase K prior to  
63 testing, using the Pace 2 Fast Expression Kit containing 1 ml diluent and lyophilized reagent (all  
64 from Hologic/Gen-Probe). 100 µl of the reconstituted proteinase K was added to each Specimen

65 Transfer Tube and incubated at 65°C for two hours. The treated specimen tube was stored at 2-  
66 8°C until testing. Testing was performed on the PANTHER platform.

67

68 *Follow-up testing for women with cytology-normal/HPV-positive test results at baseline*

69

70 Testing on HC2 for all follow-up samples was performed on the post quot material with manual

71 DNA denaturation followed by testing on the RCS.

72

73

74

75 Table S1. Description of HPV infections in samples with one, two or three HPV assays returning a  
 76 positive test result. Comparison limited to detection of HPV by HC2, cobas or APTIMA.

|                                                  |          | <b>HPV genotype distribution (row %)<sup>a</sup></b> |                                 |                                     |                        |
|--------------------------------------------------|----------|------------------------------------------------------|---------------------------------|-------------------------------------|------------------------|
| <b>HPV test results</b>                          | <b>N</b> | <b>HPV 16</b>                                        | <b>Non-HPV 16 high-risk HPV</b> | <b>Only low-risk HPV infections</b> | <b>No HPV genotype</b> |
| <b>Primary screening at 30-65 years (N=2859)</b> |          |                                                      |                                 |                                     |                        |
| 1 positive                                       | 245      | 16 (6.5%)                                            | 69 (28.2%)                      | 52 (21.2%)                          | 108 (44.1%)            |
| 2 positive                                       | 100      | 26 (26.0%)                                           | 56 (56.0%)                      | 9 (9.0%)                            | 9 (9.0%)               |
| 3 positive                                       | 208      | 41 (19.7%)                                           | 147 (70.7%)                     | 11 (5.3%)                           | 9 (4.3%)               |
| <b>Referral population (N=885)</b>               |          |                                                      |                                 |                                     |                        |
| 1 positive                                       | 116      | 14 (12.1%)                                           | 33 (28.4%)                      | 37 (31.9%)                          | 32 (27.6%)             |
| 2 positive                                       | 79       | 13 (16.5%)                                           | 50 (63.3%)                      | 13 (16.5%)                          | 3 (3.8%)               |
| 3 positive                                       | 304      | 100 (32.9%)                                          | 190 (62.5%)                     | 12 (3.9%)                           | 2 (0.7%)               |

77 Abbreviations: HPV=Human Papillomavirus. Primary screening=women with a cytological  
 78 sample at age 30-65 years with no recent cervical abnormalities (see Methods). Referral  
 79 population=women with an abnormal cytological sample attending primary screening, or women  
 80 attending follow-up for recent cervical abnormalities at any age (see Methods).

81 <sup>a</sup> As detected by the CLART assay.
